# Supplementary material
Source: publisher figshare collection journal article supplement (https://acs.figshare.com/ndownloader/files/16757504)
Supplement: Supplementary file 1 [file 16757504]

# Observation of Ultrafast Intersystem Crossing in Thymine by Extreme Ultraviolet Time-Resolved Photoelectron Spectroscopy

*Thomas J. A. Wolff<sup>\*,†</sup>, Robert M. Parrish<sup>†‡</sup>, Rolf H. Myhre<sup>§</sup>, Todd J. Martínez<sup>†‡</sup>, Henrik*

*Koch<sup>||</sup>, Markus Gühr<sup>†⊥,\*</sup>*

<sup>†</sup>Stanford PULSE Institute, SLAC National Accelerator Laboratory, Menlo Park, USA.

<sup>‡</sup>Department of Chemistry, Stanford University, Stanford, USA.

<sup>§</sup>Department of Chemistry, Norwegian University of Science and Technology, NO-7491

Trondheim, Norway.

<sup>||</sup>Scuola Normale Superiore, Piazza dei Cavalieri, 7, 56126 Pisa PI, Italy.

<sup>⊥</sup>Institut für Physik und Astronomie, Universität Potsdam, Potsdam, Germany.

## Supporting Information

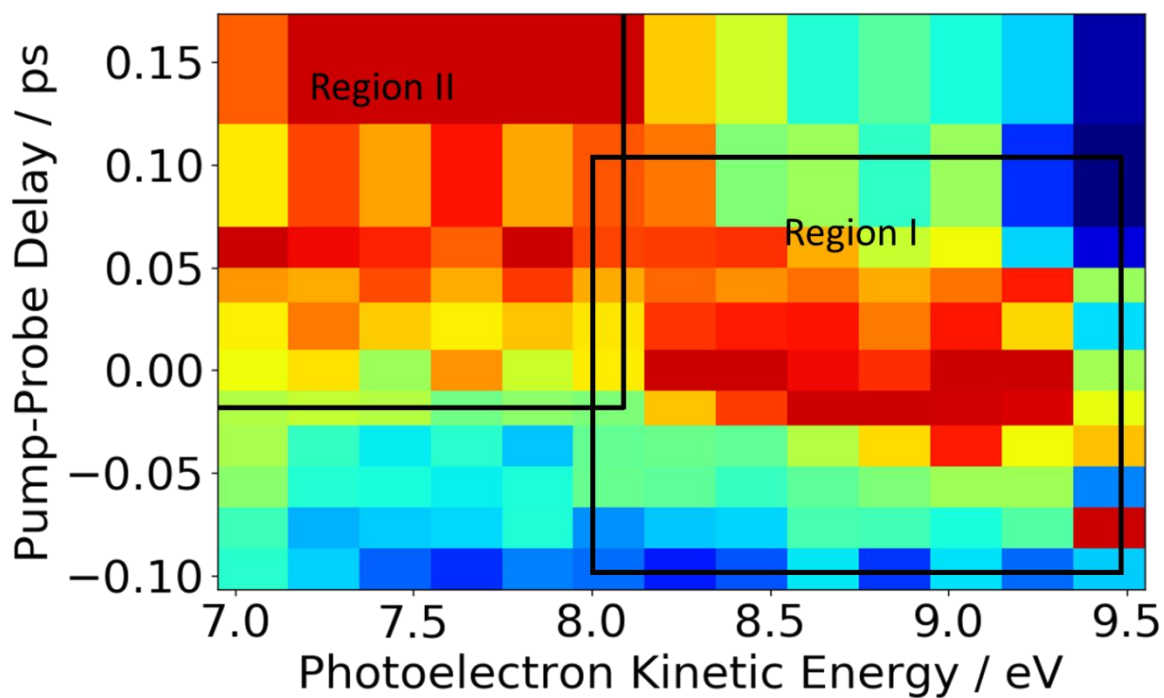

**Figure S1:** Representation of the time-resolved photoelectron spectra with each photoelectron kinetic energy slice normalized to its maximum. The signature in region I shows a clear tilt towards lower photoelectron kinetic energies and later delay times.

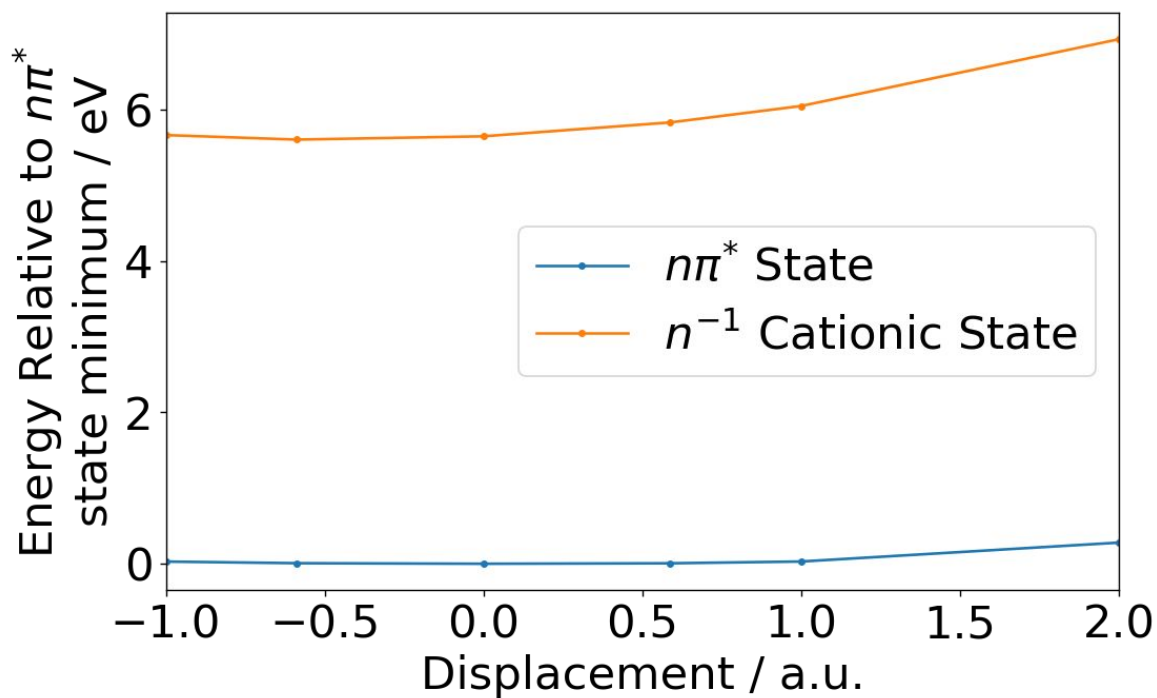

**Figure S2:** Results from a scan of the lowest vibrational mode of the  $n\pi^*$  minimum of thymine. The curvature of the Koopmans-correlated cationic state is considerably stronger than the  $n\pi^*$  state. The photoelectron band center is therefore crucially sensitive to the wavepacket distribution in the  $n\pi^*$  state and cannot be simply compared to the ionization potential at the minimum geometry.
